# Supplementary material
Source: publisher figshare collection journal article supplement (https://gsajournals.figshare.com/ndownloader/files/25468385)
Supplement: Supplementary file 1 [file 25468385]

**Table S4. Ste12-dependent regulon**

| Transcript ID | ku70-Induced vs ku70-Control (betas) | ste12-Control vs ku70-Control (betas) | ste12-Control vs ste12-Induced (betas) | Sequence Description |
| --- | --- | --- | --- | --- |
| EYR41_007710-T1 | 7.607 | 0.051 | 2.521 | ---NA--- |
| EYR41_007970-T1 | 6.993 | 0.172 | 3.243 | XP_001241759.1GABA permease |
| EYR41_003104-T1 | 6.903 | -0.206 | 2.797 | XP_001258818.1WSC domain protein |
| EYR41_001312-T1 | 6.887 | -0.741 | 2.577 | AAU06196.1Gas1-like protein |
| EYR41_009116-T1 | 6.265 | -0.058 | 2.228 | ---NA--- |
| EYR41_007764-T1 | 6.188 | 0.961 | 1.878 | XP_001274115.1carbonyl reductase, putative |
| EYR41_003507-T1 | 6.164 | -0.279 | 1.113 | ---NA--- |
| EYR41_005237-T1 | 5.974 | 0.800 | 1.425 | XP_001268027.1integral membrane protein, putative |
| EYR41_003506-T1 | 5.737 | -0.377 | 2.368 | ---NA--- |
| EYR41_005024-T1 | 5.734 | -0.464 | 2.631 | ---NA--- |
| EYR41_007636-T1 | 5.728 | -0.748 | 3.128 | WP_014267175.1ricin B lectin |
| EYR41_009457-T1 | 5.660 | 0.218 | 1.403 | ---NA--- |
| EYR41_000082-T1 | 5.624 | 0.713 | 1.246 | XP_001267705.1vacuolar H+\/Ca2+ exchanger |
| EYR41_001062-T1 | 5.559 | 0.150 | 1.287 | ---NA--- |
| EYR41_008680-T1 | 5.432 | 0.864 | -0.282 | XP_001792244.1hypothetical protein SNOG_01608 |
| EYR41_000002-T1 | 5.404 | 0.644 | 1.889 | ---NA--- |
| EYR41_004262-T1 | 5.356 | 0.328 | 0.642 | ---NA--- |
| EYR41_005272-T1 | 5.245 | -0.418 | 2.122 | ---NA--- |
| EYR41_004352-T1 | 5.116 | -0.222 | 1.050 | ---NA--- |
| EYR41_007340-T1 | 5.099 | 0.332 | 2.014 | ---NA--- |
| EYR41_008439-T1 | 4.907 | 0.732 | 0.774 | ---NA--- |
| EYR41_001967-T1 | 4.746 | -0.513 | 1.955 | ---NA--- |
| EYR41_003442-T1 | 4.712 | -0.288 | 1.546 | XP_001210572.1predicted protein |
| EYR41_007672-T1 | 4.688 | 0.919 | 1.017 | XP_001270322.1DUF341 domain protein |
| EYR41_010632-T1 | 4.682 | -0.087 | 1.131 | XP_003716588.1initiation-specific alpha-1,6-mannosyltransferase |
| EYR41_002416-T1 | 4.648 | 0.320 | 0.483 | XP_001262545.1lipoxygenase, putative |
| EYR41_009950-T1 | 4.615 | -0.459 | 1.706 | XP_002796549.1short-chain dehydrogenase |
| EYR41_008793-T1 | 4.507 | 0.182 | 1.666 | ---NA--- |
| EYR41_005279-T1 | 4.411 | -0.079 | 1.124 | ---NA--- |
| EYR41_004492-T1 | 4.395 | 0.470 | -0.605 | XP_001801025.1hypothetical protein SNOG_10765 |
| EYR41_003117-T1 | 4.335 | 0.176 | 0.954 | XP_003712839.1NADPH oxidase regulator NoxR |
| EYR41_000003-T1 | 4.241 | -0.103 | 1.881 | XP_001267359.1MFS transporter, putative |
| EYR41_009700-T1 | 4.176 | 0.005 | 0.006 | ---NA--- |
| EYR41_011739-T1 | 4.173 | -0.042 | 1.509 | ---NA--- |
| EYR41_004668-T1 | 4.142 | -0.507 | 1.498 | ---NA--- |
| EYR41_009694-T1 | 4.024 | -0.108 | 0.842 | AAU06196.1Gas1-like protein |
| EYR41_001934-T2 | 4.018 | 0.446 | 3.768 | ---NA--- |
| EYR41_007011-T1 | 3.992 | 0.351 | 2.350 | ---NA--- |
| EYR41_008842-T1 | 3.954 | -0.557 | NA | XP_003713851.1C-5 sterol desaturase |
| EYR41_009119-T1 | 3.882 | -0.022 | 1.155 | ---NA--- |
| EYR41_002025-T1 | 3.724 | -0.294 | 0.874 | XP_001887859.1predicted protein |
| EYR41_000467-T1 | 3.689 | 0.293 | 0.377 | ---NA--- |
| EYR41_000055-T1 | 3.684 | -0.362 | 1.117 | CAC42869.1putative syntaxin |
| EYR41_011134-T1 | 3.677 | 0.120 | 0.248 | ---NA--- |
| EYR41_003916-T1 | 3.606 | 0.658 | 1.049 | XP_002542580.1predicted protein |
| EYR41_009946-T1 | 3.486 | 0.006 | 0.255 | ---NA--- |
| EYR41_004238-T3 | 3.433 | -0.739 | 1.403 | AOA62104.1 GQ67_00533T0 |
| EYR41_003042-T1 | 3.430 | 0.567 | 1.494 | XP_001261560.1plasma membrane protein Pth11, putative |
| EYR41_010872-T1 | 3.391 | 0.499 | 0.341 | ---NA--- |
| EYR41_004544-T1 | 3.320 | -0.163 | 1.212 | ---NA--- |
| EYR41_007363-T1 | 3.309 | 0.449 | 0.032 | ---NA--- |
| EYR41_002985-T1 | 3.259 | 0.886 | 0.473 | CAG86316.1 DEHA2C12980p |
| EYR41_008854-T1 | 3.253 | -0.548 | 2.500 | ABE73692.1eliciting plant response-like protein |
| EYR41_008747-T1 | 3.248 | -0.796 | 1.771 | XP_001258411.1CRAL/TRIO domain protein |
| EYR41_010944-T1 | 3.229 | -0.265 | 1.764 | EAU37628.1 cholinesterase |
| EYR41_006917-T1 | 3.182 | 0.099 | 1.361 | XP_003708907.1lipase 2 |
| EYR41_011461-T1 | 3.159 | 0.137 | 0.339 | AAQ74977.1 NADPH oxidase isoform 2 |
| EYR41_000158-T1 | 3.152 | -0.545 | NA | XP_002584361.1predicted protein |
| EYR41_001316-T1 | 3.136 | 0.574 | 1.305 | ---NA--- |
| EYR41_011794-T1 | 3.101 | -0.508 | 2.424 | AAC27316.2serine protease precursor |
| EYR41_000005-T1 | 3.077 | -0.394 | 0.551 | ---NA--- |
| EYR41_003540-T1 | 3.069 | 0.463 | 0.305 | CAC18164.2related to malate dehydrogenase (oxaloacetate-decarboxylating) (NADP+) |
| EYR41_011116-T1 | 3.065 | -0.506 | 1.684 | ---NA--- |
| EYR41_008446-T1 | 3.058 | -0.700 | 0.913 | XP_024511873.1two-component sensor molecule, putative |
| EYR41_004774-T1 | 3.054 | 0.146 | 0.755 | ---NA--- |
| EYR41_006320-T2 | 2.976 | 0.954 | 1.688 | ---NA--- |
| EYR41_000025-T1 | 2.975 | 0.507 | 1.214 | CAE55153.1 putative G protein-coupled receptor alpha |
| EYR41_004905-T1 | 2.936 | -0.471 | 0.310 | XP_001276468.1H /K ATPase alpha subunit, putative |
| EYR41_009115-T1 | 2.922 | 0.765 | 0.063 | XP_001893913.1Matrixin family protein |
| EYR41_004802-T1 | 2.922 | -0.715 | 1.354 | XP_001097508.2 matrilysin |
| EYR41_010550-T1 | 2.921 | -0.643 | 1.535 | XP_001247631.16-hydroxy-D-nicotine oxidase |
| EYR41_007362-T1 | 2.909 | -0.040 | -0.008 | ---NA--- |
| EYR41_008813-T1 | 2.907 | 0.670 | 0.190 | ---NA--- |
| EYR41_005574-T1 | 2.905 | 0.236 | 1.105 | ---NA--- |
| EYR41_009740-T1 | 2.893 | -0.570 | 0.825 | ---NA--- |
| EYR41_000470-T1 | 2.847 | 0.043 | 1.092 | ---NA--- |
| EYR41_001831-T1 | 2.803 | -0.084 | 0.218 | XP_001270190.1IgE-binding protein, putative |
| EYR41_005442-T1 | 2.746 | -0.159 | 0.885 | XP_001209389.1protein ycaC |
| EYR41_001643-T1 | 2.718 | 0.517 | 0.045 | XP_001800110.1hypothetical protein SNOG_09824 |
| EYR41_011959-T1 | 2.714 | 0.293 | 1.638 | ---NA--- |
| EYR41_005628-T1 | 2.639 | -0.939 | 0.396 | ---NA--- |
| EYR41_005621-T1 | 2.630 | 0.794 | 1.742 | XP_001215315.1predicted protein |
| EYR41_006535-T1 | 2.629 | -0.168 | 0.500 | ---NA--- |
| EYR41_008043-T1 | 2.620 | -0.299 | 0.937 | ---NA--- |
| EYR41_010016-T1 | 2.605 | 0.947 | 1.263 | ---NA--- |
| EYR41_000576-T1 | 2.589 | 0.418 | 0.069 | ---NA--- |
| EYR41_007613-T1 | 2.589 | -0.437 | 1.125 | XP_002543398.1glutamine-dependent NAD(+) synthetase synthase [glutamine-hydrolyzing]) |
| EYR41_004578-T1 | 2.569 | 0.958 | 0.906 | ---NA--- |
| EYR41_005897-T2 | 2.561 | 0.352 | -2.106 | XP_001257495.1MFS multidrug transporter, putative |
| EYR41_006846-T1 | 2.548 | 0.308 | 0.067 | ---NA--- |
| EYR41_009591-T1 | 2.545 | 0.658 | 0.009 | ---NA--- |
| EYR41_004079-T1 | 2.522 | 0.948 | 0.684 | ---NA--- |
| EYR41_009058-T1 | 2.494 | 0.124 | 0.752 | ---NA--- |
| EYR41_008931-T1 | 2.485 | 0.077 | 0.529 | XP_003708907.1lipase 2 |
| EYR41_009973-T1 | 2.464 | -0.586 | 0.527 | ---NA--- |
| EYR41_008804-T1 | 2.462 | 0.073 | 0.949 | EAU37628.1 cholinesterase |
| EYR41_005897-T1 | 2.459 | -0.788 | -0.048 | XP_001257495.1MFS multidrug transporter, putative |
| EYR41_002621-T1 | 2.405 | 0.529 | 0.952 | ---NA--- |
| EYR41_008128-T1 | 2.360 | 0.359 | 0.261 | ELQ40519.1 spermine/spermidine synthase family protein |
| EYR41_004907-T2 | 2.355 | 0.475 | 0.271 | ---NA--- |
| EYR41_002028-T1 | 2.334 | -0.100 | -0.531 | XP_001260777.1X-Pro dipeptidyl-peptidase (S15 family) protein |
| EYR41_006707-T1 | 2.325 | 0.605 | 2.708 | ---NA--- |
| EYR41_006439-T1 | 2.315 | -0.756 | 0.802 | XP_001276572.1C4-dicarboxylate transporter/malic acid transport protein, putative |
| EYR41_001429-T1 | 2.313 | 0.630 | 0.549 | ---NA--- |
| EYR41_007737-T1 | 2.292 | 0.033 | -0.666 | ---NA--- |
| EYR41_008174-T1 | 2.292 | 0.237 | 0.896 | XP_001270247.1Ctr copper transporter, putative |
| EYR41_002329-T1 | 2.278 | 0.038 | 0.937 | ---NA--- |
| EYR41_001878-T1 | 2.272 | 0.947 | 0.035 | ---NA--- |
| EYR41_010772-T1 | 2.270 | 0.761 | 1.281 | ---NA--- |
| EYR41_010877-T1 | 2.268 | 0.972 | 0.461 | ---NA--- |
| EYR41_011201-T1 | 2.216 | -0.562 | 0.676 | XP_002543097.1conserved hypothetical protein |
| EYR41_011200-T1 | 2.211 | -0.351 | 0.690 | XP_002544415.1predicted protein |
| EYR41_007681-T1 | 2.211 | 0.135 | 0.412 | ---NA--- |
| EYR41_010873-T1 | 2.201 | -0.735 | 0.100 | XP_001264866.1lactonohydrolase, putative |
| EYR41_005055-T1 | 2.199 | -0.200 | 1.745 | ---NA--- |
| EYR41_006447-T1 | 2.180 | -0.731 | NA | XP_001887859.1predicted protein |
| EYR41_004402-T1 | 2.153 | 0.359 | 1.111 | XP_002545064.160S ribosomal protein L22 |
| EYR41_008870-T1 | 2.120 | -0.315 | 0.930 | XP_001268851.1integral membrane protein, putative |
| EYR41_008898-T1 | 2.119 | 0.248 | 0.817 | XP_001884967.1predicted protein |
| EYR41_008137-T1 | 2.109 | 0.766 | 0.466 | ---NA--- |
| EYR41_000941-T1 | 2.103 | 0.438 | -0.263 | ---NA--- |
| EYR41_002794-T1 | 2.094 | 0.290 | 0.552 | XP_001240390.1cyclopropane-fatty-acyl-phospholipid synthase |
| EYR41_010771-T1 | 2.093 | 0.332 | 1.089 | XP_001883345.1predicted protein |
| EYR41_010532-T1 | 2.091 | 0.977 | 1.102 | XP_011394288.1PfkB family carbohydrate kinase, variant |
| EYR41_000461-T1 | 2.085 | 0.699 | 2.262 | XP_001264010.1tyrosinase central domain protein |
| EYR41_003031-T1 | 2.076 | -0.638 | 0.554 | XP_001793300.1hypothetical protein SNOG_02702 |
| EYR41_010139-T2 | 2.070 | 0.015 | 0.165 | ---NA--- |
| EYR41_004475-T1 | 2.062 | -0.032 | 1.731 | ---NA--- |
| EYR41_011405-T1 | 2.048 | 0.231 | 0.997 | XP_001217909.1predicted protein |
| EYR41_011946-T1 | 2.047 | -0.195 | -0.405 | ---NA--- |
| EYR41_001793-T1 | 2.041 | 0.472 | 0.792 | ---NA--- |
| EYR41_006057-T1 | 2.040 | 0.489 | 0.920 | ---NA--- |
| EYR41_011400-T1 | 2.036 | 0.309 | 0.879 | AOA64905.1 GQ67_04508T0 |
| EYR41_002380-T1 | 2.030 | 0.280 | 0.625 | ---NA--- |
| EYR41_000001-T1 | 2.028 | -0.264 | 0.321 | XP_001268490.1polyketide synthase, putative |
| EYR41_007815-T1 | 2.022 | 0.816 | -0.022 | ---NA--- |
| EYR41_011406-T1 | 2.022 | 0.666 | 0.799 | XP_001266212.1microsomal signal peptidase subunit (gp23), putative |
| EYR41_003519-T1 | 2.017 | 0.717 | 0.034 | XP_001263009.1lipase/esterase family protein, putative |
| EYR41_005843-T1 | 2.015 | -0.433 | 0.127 | ---NA--- |
| EYR41_008920-T1 | 2.007 | 0.982 | 0.738 | XP_001208731.1predicted protein |
| EYR41_006509-T1 | 2.005 | 0.003 | 0.434 | ---NA--- |
| EYR41_005095-T1 | -2.001 | -0.274 | -0.347 | ---NA--- |
| EYR41_003597-T2 | -2.001 | -0.565 | -1.724 | XP_002543134.1predicted protein |
| EYR41_005810-T1 | -2.002 | -0.270 | -1.262 | WP_011595933.1FAD-binding oxidoreductase |
| EYR41_010789-T1 | -2.009 | -0.258 | -1.752 | XP_001272746.1C2H2 finger domain protein, putative |
| EYR41_011528-T1 | -2.017 | -0.575 | -1.477 | XP_001263043.1BAR adaptor protein RVS167, putative |
| EYR41_005865-T1 | -2.017 | -0.469 | -0.917 | CDR37760.1 CYFA0S01e16578g1_1 |
| EYR41_002190-T1 | -2.020 | 0.082 | -1.918 | XP_002542453.1predicted protein |
| EYR41_010418-T1 | -2.020 | -0.588 | -1.071 | XP_001260708.1carnitine acetyl transferase |
| EYR41_000604-T1 | -2.024 | 0.431 | -1.073 | XP_001883042.1predicted protein |
| EYR41_004053-T1 | -2.026 | 0.578 | 0.045 | ---NA--- |
| EYR41_004543-T1 | -2.026 | -0.757 | -0.853 | XP_001266723.1developmental regulatory protein WetA |
| EYR41_004717-T1 | -2.031 | -0.528 | -0.831 | XP_001264854.1Patatin-like serine hydrolase, putative |
| EYR41_011046-T1 | -2.034 | -0.674 | -1.477 | XP_001275777.1C2H2 finger domain protein FlbC |
| EYR41_012031-T1 | -2.037 | 0.360 | -1.022 | XP_001258434.1metallo-beta-lactamase domain protein, putative |
| EYR41_005595-T1 | -2.041 | -0.925 | -1.287 | XP_003028919.1polysaccharide lyase family 1 protein |
| EYR41_007028-T1 | -2.047 | -0.864 | -0.575 | XP_001244988.1protein SIP5 |
| EYR41_000233-T1 | -2.049 | -0.667 | -0.550 | ---NA--- |
| EYR41_006270-T2 | -2.049 | -0.706 | -0.996 | XP_001877123.1predicted protein |
| EYR41_010494-T1 | -2.049 | -0.085 | -1.170 | ---NA--- |
| EYR41_009338-T1 | -2.052 | -0.652 | -1.434 | XP_001245155.1vanillin dehydrogenase |
| EYR41_006735-T1 | -2.054 | 0.147 | -1.841 | XP_001214505.1lysophospholipase precursor |
| EYR41_003389-T1 | -2.060 | -0.010 | -0.325 | ---NA--- |
| EYR41_009301-T1 | -2.060 | -0.854 | -1.040 | XP_001269682.1peroxisomal ABC transporter (PXA1), putative |
| EYR41_012070-T1 | -2.060 | -0.945 | -0.261 | XP_002585031.1predicted protein |
| EYR41_002645-T1 | -2.074 | -0.603 | -1.251 | ---NA--- |
| EYR41_008108-T1 | -2.076 | -0.542 | -0.806 | XP_002793831.1methylcrotonoyl-CoA carboxylase beta chain |
| EYR41_006421-T1 | -2.077 | -0.027 | -1.780 | ---NA--- |
| EYR41_006739-T1 | -2.077 | -0.382 | -0.619 | BAF86416.1hypothetical protein AZC_0418 |
| EYR41_008259-T1 | -2.081 | 0.153 | -1.382 | ---NA--- |
| EYR41_002822-T1 | -2.087 | -0.557 | -1.054 | ---NA--- |
| EYR41_010281-T1 | -2.094 | -0.598 | -1.603 | EHA53595.1 bli-3 |
| EYR41_010543-T1 | -2.101 | 0.221 | -1.208 | XP_001215538.1predicted protein |
| EYR41_002287-T1 | -2.101 | -0.991 | -0.679 | WP_012919668.1hyaluronate lyase |
| EYR41_006374-T1 | -2.103 | -0.092 | -1.627 | XP_001798886.1hypothetical protein SNOG_08577 |
| EYR41_005250-T1 | -2.104 | -0.179 | -1.418 | ---NA--- |
| EYR41_005216-T1 | -2.108 | -0.301 | -1.037 | XP_002543434.1predicted protein |
| EYR41_006529-T1 | -2.110 | 0.737 | -0.482 | XP_001267494.1von Willebrand factor type A domain protein |
| EYR41_004433-T1 | -2.110 | 0.404 | -1.506 | XP_001243090.1acyl-CoA dehydrogenase |
| EYR41_003867-T1 | -2.110 | -0.133 | -1.248 | ---NA--- |
| EYR41_004709-T1 | -2.111 | 0.138 | -0.701 | XP_962197.2general amino acid permease |
| EYR41_011751-T1 | -2.114 | 0.583 | -0.682 | ---NA--- |
| EYR41_000064-T1 | -2.118 | -0.659 | -0.846 | XP_003720413.1sugar transporter |
| EYR41_011373-T1 | -2.119 | -0.153 | -0.926 | XP_002794068.1peroxisomal NADH pyrophosphatase NUDT12 |
| EYR41_004753-T1 | -2.122 | -0.719 | -1.931 | XP_001271789.1PAP2 superfamily protein |
| EYR41_000434-T1 | -2.124 | 0.380 | -1.410 | ---NA--- |
| EYR41_011208-T1 | -2.128 | -0.553 | -1.273 | ---NA--- |
| EYR41_009633-T1 | -2.131 | 0.259 | -1.891 | ---NA--- |
| EYR41_000787-T1 | -2.131 | -0.091 | -1.560 | CAB99181.1related to long-chain-fatty-acid--CoA ligase FAA2 |
| EYR41_006523-T1 | -2.132 | -0.615 | -1.419 | XP_001268517.1phosphatidylserine decarboxylase, putative |
| EYR41_004723-T1 | -2.133 | -0.453 | -1.327 | ---NA--- |
| EYR41_009637-T1 | -2.134 | -0.456 | -1.411 | ---NA--- |
| EYR41_011759-T1 | -2.136 | -0.659 | -0.871 | XP_002541630.1predicted protein |
| EYR41_000019-T1 | -2.137 | 0.309 | -1.565 | XP_001210960.1predicted protein |
| EYR41_003610-T1 | -2.144 | 0.025 | -1.623 | EAS29079.3 oxidoreductase |
| EYR41_000592-T1 | -2.150 | -0.733 | -0.587 | C4R3K5.1 RecName: Full=Restriction of telomere capping protein 5 |
| EYR41_007042-T1 | -2.156 | -0.685 | -0.674 | XP_001262342.1cytochrome C1 heme lyase |
| EYR41_011871-T1 | -2.157 | -0.390 | -0.599 | ---NA--- |
| EYR41_010214-T1 | -2.159 | -0.577 | -0.707 | ---NA--- |
| EYR41_006819-T1 | -2.159 | -0.629 | -1.132 | XP_001210934.12-isopropylmalate synthase |
| EYR41_007730-T1 | -2.162 | -0.118 | -1.995 | ---NA--- |
| EYR41_000951-T1 | -2.174 | -0.027 | -1.508 | ---NA--- |
| EYR41_006461-T1 | -2.174 | -0.810 | -1.419 | XP_001262050.1C2H2 finger domain protein, putative |
| EYR41_000972-T1 | -2.175 | -0.207 | -1.414 | B0XPP3.2RecName: Full=Metacaspase-1A; Flags: Precursor |
| EYR41_006606-T1 | -2.177 | -0.390 | -0.910 | XP_002545086.1predicted protein |
| EYR41_004005-T1 | -2.182 | 0.160 | -1.414 | ---NA--- |
| EYR41_010069-T1 | -2.182 | -0.776 | -1.097 | AAU06196.1Gas1-like protein |
| EYR41_004400-T1 | -2.183 | 0.035 | -1.788 | XP_001875355.1predicted protein |
| EYR41_010746-T1 | -2.187 | 0.024 | -1.037 | EAS35942.3 oxidoreductase |
| EYR41_000991-T1 | -2.187 | -0.678 | -1.052 | EHA52438.1 Ras-2 |
| EYR41_006007-T2 | -2.189 | 0.268 | -1.396 | XP_001275970.1epoxide hydrolase |
| EYR41_003176-T1 | -2.191 | -0.826 | -0.557 | XP_001263268.1transcription regulator PAB1642, putative |
| EYR41_001004-T1 | -2.191 | -0.302 | -1.900 | XP_001247355.1hypothetical protein CIMG_01126 |
| EYR41_001454-T1 | -2.196 | 0.333 | -0.436 | ---NA--- |
| EYR41_007743-T1 | -2.198 | -0.508 | -1.413 | XP_001211379.1predicted protein |
| EYR41_011057-T1 | -2.199 | 0.178 | -1.404 | ---NA--- |
| EYR41_010562-T1 | -2.199 | -0.988 | -1.758 | WP_013183919.1amino acid adenylation domain-containing protein |
| EYR41_008223-T1 | -2.203 | -0.211 | -1.826 | CAL46260.1 putative mitochondrial inner membrane protein 1 |
| EYR41_007273-T1 | -2.203 | -0.643 | -1.091 | XP_001272574.1DnaJ chaperone (Caj1), putative |
| EYR41_007122-T1 | -2.205 | -0.786 | -1.176 | XP_001260531.1urate oxydase UaZ |
| EYR41_003163-T1 | -2.207 | 0.169 | -1.264 | ---NA--- |
| EYR41_001888-T1 | -2.215 | -0.291 | -1.744 | ---NA--- |
| EYR41_007958-T1 | -2.219 | -0.512 | -0.879 | XP_002543374.1predicted protein |
| EYR41_003450-T1 | -2.223 | -0.767 | -1.362 | XP_001259747.1clock controled protein (Ccg-8), putative |
| EYR41_008735-T1 | -2.223 | 0.544 | -0.920 | XP_002489748.1MAP kinase kinase that plays a pivotal role in the osmosensing signal-transduction pathway |
| EYR41_011492-T2 | -2.226 | 0.790 | 1.114 | XP_001263064.1metaphase-anaphase transition protein (Mlo2), putative |
| EYR41_010996-T1 | -2.226 | -0.525 | -1.196 | XP_001246317.1von Willebrand domain-containing protein |
| EYR41_002526-T1 | -2.226 | 0.008 | -1.372 | ---NA--- |
| EYR41_005306-T1 | -2.231 | -0.220 | -1.434 | XP_001272588.1l-fucose permease, putative |
| EYR41_004727-T1 | -2.251 | -0.131 | -1.373 | XP_001213666.1predicted protein |
| EYR41_000071-T1 | -2.258 | -0.974 | -1.136 | XP_001258066.1lipase/esterase family protein |
| EYR41_002542-T1 | -2.267 | -0.146 | -1.919 | WP_012947932.1alpha/beta hydrolase |
| EYR41_001300-T1 | -2.267 | 0.166 | -0.515 | XP_001257306.1isoflavone reductase family protein |
| EYR41_011927-T1 | -2.269 | 0.849 | -1.859 | XP_001258776.1class II aldolase/adducin domain protein |
| EYR41_000795-T1 | -2.271 | -0.406 | -1.286 | ---NA--- |
| EYR41_007854-T1 | -2.271 | -0.194 | -1.633 | XP_002791969.1transmembrane and coiled-coil domain containing protein |
| EYR41_006460-T1 | -2.271 | 0.426 | 0.192 | ---NA--- |
| EYR41_009359-T1 | -2.276 | -0.618 | -0.552 | XP_001246463.1MATE efflux family protein |
| EYR41_007604-T1 | -2.277 | -0.486 | -1.318 | ---NA--- |
| EYR41_011878-T1 | -2.285 | -0.409 | -1.911 | ---NA--- |
| EYR41_010390-T1 | -2.285 | -0.981 | -1.035 | AAI28915.1LOC496170 protein |
| EYR41_003073-T1 | -2.287 | 0.248 | -1.330 | KMP04225.1 oxidoreductase |
| EYR41_005813-T1 | -2.289 | -0.583 | -0.557 | KMP01741.1 chalcone synthase 3 |
| EYR41_008594-T1 | -2.289 | -0.165 | -0.841 | ---NA--- |
| EYR41_006143-T1 | -2.298 | -0.772 | -0.978 | XP_002583828.1predicted protein |
| EYR41_011091-T1 | -2.299 | -0.286 | -0.777 | XP_003714477.16-phosphogluconate dehydrogenase |
| EYR41_004347-T1 | -2.299 | 0.932 | -1.142 | XP_001275148.1MFS drug efflux transporter, putative |
| EYR41_004413-T1 | -2.300 | -0.091 | -1.261 | XP_001264589.1conserved hypothetical protein |
| EYR41_010980-T1 | -2.300 | -0.139 | -1.631 | XP_001214490.1high-affinity methionine permease |
| EYR41_009275-T1 | -2.304 | -0.470 | -0.951 | XP_002585334.1predicted protein |
| EYR41_002587-T1 | -2.306 | -0.578 | -0.722 | ---NA--- |
| EYR41_004848-T1 | -2.311 | -0.086 | -1.528 | XP_001262680.1serine/threonine-protein kinase chk2 (cds1) |
| EYR41_002009-T1 | -2.315 | -0.521 | -1.497 | XP_001269011.1LysM domain protein |
| EYR41_010756-T1 | -2.315 | -0.830 | -1.298 | XP_001272747.1DUF21 and CBS domain protein (Mam3), putative |
| EYR41_006869-T1 | -2.317 | 0.009 | -1.395 | ---NA--- |
| EYR41_009869-T1 | -2.318 | 0.049 | 0.797 | XP_001261794.1tetratricopeptide repeat domain protein |
| EYR41_011375-T1 | -2.321 | -0.884 | -0.921 | XP_001276326.1inositol polyphosphate phosphatase, putative |
| EYR41_000329-T1 | -2.323 | -0.616 | -1.467 | ---NA--- |
| EYR41_005963-T1 | -2.328 | -0.346 | -1.602 | ---NA--- |
| EYR41_003647-T1 | -2.329 | -0.744 | -1.195 | XP_003712026.1peroxisomal hydratase-dehydrogenase-epimerase |
| EYR41_002764-T1 | -2.334 | -0.313 | -1.677 | XP_011394101.1annexin XIV, variant |
| EYR41_007948-T1 | -2.341 | -0.608 | -1.655 | ---NA--- |
| EYR41_007998-T1 | -2.346 | -0.313 | -1.397 | XP_002795171.1ADAM protease ADM-B |
| EYR41_010385-T1 | -2.346 | 0.324 | -0.459 | ---NA--- |
| EYR41_005583-T1 | -2.352 | -0.251 | -1.338 | Q4WA21.2RecName: Full=Putative transcription factor kapC |
| EYR41_000731-T1 | -2.355 | 0.012 | -1.194 | XP_002790117.1hsp70-like protein |
| EYR41_007244-T1 | -2.357 | -0.575 | -0.637 | XP_002540926.1predicted protein |
| EYR41_007400-T1 | -2.360 | 0.206 | -1.427 | ---NA--- |
| EYR41_010607-T1 | -2.360 | -0.501 | -0.347 | XP_001257519.1aspartic endopeptidase (AP1), putative |
| EYR41_006873-T2 | -2.366 | -0.382 | -1.589 | XP_002792634.1cation diffusion facilitator 1 |
| EYR41_001617-T1 | -2.370 | -0.016 | -1.820 | XP_001239218.1RNA binding protein |
| EYR41_002247-T1 | -2.372 | 0.116 | -1.842 | XP_001260668.1mitochondrial phosphate carrier protein |
| EYR41_003654-T1 | -2.373 | -0.908 | -1.450 | XP_002543167.1predicted protein |
| EYR41_008670-T1 | -2.378 | -0.588 | -2.152 | ---NA--- |
| EYR41_009586-T1 | -2.380 | -0.268 | -1.949 | XP_001259646.1nitrate reductase, putative |
| EYR41_007046-T1 | -2.384 | -0.180 | -1.756 | ---NA--- |
| EYR41_003520-T1 | -2.389 | 0.275 | -1.236 | ---NA--- |
| EYR41_007554-T1 | -2.390 | 0.631 | -0.007 | ---NA--- |
| EYR41_007620-T1 | -2.391 | -0.505 | -1.140 | XP_001262798.1C6 transcription factor, putative |
| EYR41_008833-T1 | -2.397 | 0.704 | -1.289 | XP_001268875.1MFS multidrug transporter, putative |
| EYR41_007387-T1 | -2.398 | 0.241 | -1.820 | ---NA--- |
| EYR41_001070-T1 | -2.410 | 0.406 | -1.669 | ---NA--- |
| EYR41_009490-T1 | -2.410 | -0.387 | -1.569 | ---NA--- |
| EYR41_006751-T1 | -2.412 | -0.002 | -1.830 | EHA50355.1 alpha-amylase |
| EYR41_010913-T2 | -2.417 | 0.759 | -0.377 | XP_001882972.1predicted protein |
| EYR41_006861-T1 | -2.425 | -0.681 | -0.841 | XP_001839879.2hexaprenyldihydroxybenzoate methyltransferase |
| EYR41_002931-T1 | -2.427 | -0.931 | -0.314 | XP_001258446.1DEAD/DEAH box DNA helicase (Mer3), putative |
| EYR41_001667-T1 | -2.427 | -0.200 | 0.403 | XP_001275696.1FAD binding domain protein |
| EYR41_003944-T1 | -2.427 | -0.110 | -1.256 | XP_002542564.1predicted protein |
| EYR41_003183-T1 | -2.427 | 0.579 | -1.867 | ---NA--- |
| EYR41_009305-T1 | -2.429 | -0.907 | -1.213 | XP_003714409.1hypothetical protein MGG_01456 |
| EYR41_000320-T1 | -2.430 | -0.546 | -1.975 | XP_002793423.1serine/threonine-protein kinase hal4 |
| EYR41_002819-T1 | -2.430 | 0.934 | -0.005 | WP_013247219.1hypothetical protein |
| EYR41_003455-T1 | -2.432 | -0.782 | -0.834 | ---NA--- |
| EYR41_003400-T1 | -2.433 | -0.811 | -1.315 | ---NA--- |
| EYR41_008347-T1 | -2.434 | -0.121 | -1.135 | ---NA--- |
| EYR41_006488-T1 | -2.445 | -0.562 | -1.134 | ---NA--- |
| EYR41_002594-T1 | -2.445 | -0.226 | -1.333 | XP_001245452.1MFS multidrug transporter |
| EYR41_002193-T1 | -2.451 | -0.691 | -1.000 | XP_001261302.1C2 domain protein |
| EYR41_006851-T1 | -2.452 | -0.967 | -0.701 | ---NA--- |
| EYR41_000117-T1 | -2.456 | 0.223 | -1.139 | XP_001259281.1oxidoreductase, short chain dehydrogenase/reductase family |
| EYR41_002200-T1 | -2.456 | -0.142 | -0.551 | XP_001266137.1LysM domain protein |
| EYR41_002489-T1 | -2.456 | -0.117 | -1.879 | XP_001263180.1RTA1 domain protein, putative |
| EYR41_004879-T1 | -2.457 | 0.919 | -0.795 | XP_001330055.1ubiquitin conjugating protein |
| EYR41_010243-T1 | -2.459 | -0.375 | -1.439 | ---NA--- |
| EYR41_006284-T1 | -2.467 | 0.561 | -0.716 | XP_001270878.1glycine-rich RNA-binding protein, putative |
| EYR41_006314-T1 | -2.470 | -0.882 | -0.458 | ---NA--- |
| EYR41_001111-T1 | -2.475 | -0.957 | -1.620 | XP_001273125.1GDSL-like lipase/acylhydrolase, putative |
| EYR41_004931-T1 | -2.476 | 0.872 | -1.407 | XP_001262531.1glycosyl hydrolase family 88, putative |
| EYR41_006416-T2 | -2.477 | -0.475 | -2.145 | XP_001876135.1predicted protein |
| EYR41_000634-T1 | -2.482 | -0.744 | -1.456 | XP_001791705.1hypothetical protein SNOG_01046 |
| EYR41_006779-T1 | -2.483 | -0.405 | -1.375 | XP_001264240.1acyl-CoA thioesterase II |
| EYR41_002899-T1 | -2.491 | -0.579 | -1.675 | ---NA--- |
| EYR41_011526-T1 | -2.491 | -0.010 | -1.360 | XP_002793514.1peroxiredoxin HYR1 |
| EYR41_006205-T1 | -2.492 | -0.552 | -1.467 | XP_001260845.1mitochondrial carrier protein, putative |
| EYR41_010115-T1 | -2.493 | -0.906 | -0.566 | XP_001249109.1mitochondrial carnitine:acyl carnitine carrier |
| EYR41_002117-T1 | -2.496 | 0.192 | -0.118 | ---NA--- |
| EYR41_004288-T1 | -2.496 | -0.233 | -1.960 | WP_012164830.1GMC family oxidoreductase |
| EYR41_005658-T1 | -2.503 | -0.476 | -1.848 | ---NA--- |
| EYR41_006477-T1 | -2.504 | -0.110 | -1.029 | XP_002584129.1conserved hypothetical protein |
| EYR41_011701-T1 | -2.506 | -0.802 | -1.453 | ---NA--- |
| EYR41_008678-T1 | -2.513 | -0.306 | -1.011 | ---NA--- |
| EYR41_006752-T1 | -2.514 | -0.616 | -1.148 | XP_002951094.1hypothetical protein VOLCADRAFT_104950 |
| EYR41_001850-T1 | -2.514 | 0.110 | -1.710 | XP_001268697.1oxidoreductase, zinc-binding dehydrogenase family, putative |
| EYR41_006587-T1 | -2.526 | 0.768 | 0.301 | ---NA--- |
| EYR41_011073-T1 | -2.538 | 0.089 | -0.995 | ---NA--- |
| EYR41_009488-T1 | -2.538 | -0.442 | -1.367 | AOA63510.1 GQ67_03401T0 |
| EYR41_011569-T1 | -2.541 | -0.473 | -0.693 | WP_012760198.1DUF1223 domain-containing protein |
| EYR41_003184-T1 | -2.545 | -0.566 | -1.608 | XP_001266678.1conserved hypothetical protein |
| EYR41_011166-T1 | -2.550 | -0.740 | -1.373 | ---NA--- |
| EYR41_006740-T1 | -2.551 | -0.465 | -1.082 | XP_001268658.1extracellular cell wall glucanase Crf1/allergen Asp F9 |
| EYR41_010598-T1 | -2.565 | -0.974 | -0.895 | XP_001261485.1thiamine pyrophosphokinase, putative |
| EYR41_004857-T1 | -2.569 | -0.318 | -0.189 | ---NA--- |
| EYR41_011209-T1 | -2.572 | -0.457 | -1.407 | ---NA--- |
| EYR41_010593-T1 | -2.573 | -0.563 | -0.731 | XP_001245629.1alcohol dehydrogenase |
| EYR41_010601-T1 | -2.576 | 0.885 | -1.973 | XP_001888870.1predicted protein |
| EYR41_010736-T1 | -2.579 | -0.689 | -1.477 | ---NA--- |
| EYR41_006084-T1 | -2.582 | 0.104 | -1.887 | ---NA--- |
| EYR41_001564-T4 | -2.585 | -0.578 | -0.902 | XP_001258458.1autophagy regulatory protein Atg2, putative |
| EYR41_002321-T1 | -2.586 | -0.268 | -1.504 | ---NA--- |
| EYR41_003457-T1 | -2.613 | 0.277 | -1.773 | AAT91266.1CipC2 protein |
| EYR41_012076-T1 | -2.615 | -0.519 | -1.442 | XP_001270833.1fumarylacetoacetate hydrolase family protein |
| EYR41_007024-T1 | -2.615 | -0.222 | -1.591 | XP_002796339.1actin cytoskeleton protein (VIP1) |
| EYR41_007691-T1 | -2.623 | -0.676 | -0.044 | ---NA--- |
| EYR41_007559-T1 | -2.623 | 0.302 | -1.006 | XP_001257580.1C-5 cytosine methyltransferase DmtA |
| EYR41_002541-T1 | -2.624 | 0.089 | -1.293 | ---NA--- |
| EYR41_011968-T1 | -2.637 | 0.014 | -1.771 | XP_956307.1nonspecific lipid-transfer protein |
| EYR41_011205-T1 | -2.640 | 0.494 | -1.731 | XP_001265717.1FAD binding domain protein |
| EYR41_010510-T1 | -2.645 | -0.548 | -2.863 | XP_001269723.1endo-1,3-beta-glucanase Engl1 |
| EYR41_007248-T1 | -2.645 | -0.875 | -1.412 | ---NA--- |
| EYR41_003876-T1 | -2.647 | -0.376 | -1.313 | CBN79454.2ankyrin repeat protein () |
| EYR41_002579-T1 | -2.652 | -0.977 | -1.248 | XP_001885940.1predicted protein |
| EYR41_000245-T1 | -2.655 | 0.930 | -0.743 | XP_002583459.1predicted protein |
| EYR41_003747-T1 | -2.660 | 0.592 | -1.877 | ---NA--- |
| EYR41_009999-T1 | -2.660 | -0.273 | -2.089 | ---NA--- |
| EYR41_010759-T1 | -2.668 | 0.983 | -1.124 | XP_002543401.1predicted protein |
| EYR41_000705-T1 | -2.670 | -0.225 | 3.317 | XP_001273090.1Cytochrome P450 oxidoreductase, putative |
| EYR41_010136-T1 | -2.696 | -0.413 | -1.228 | ---NA--- |
| EYR41_010581-T2 | -2.702 | 0.029 | 0.222 | ---NA--- |
| EYR41_004877-T1 | -2.703 | 0.974 | -1.017 | ---NA--- |
| EYR41_007690-T1 | -2.706 | -0.791 | -2.467 | ---NA--- |
| EYR41_010185-T1 | -2.708 | 0.575 | -1.731 | ---NA--- |
| EYR41_005398-T1 | -2.709 | -0.948 | -0.570 | WP_013229809.1isoprenyl transferase |
| EYR41_004651-T1 | -2.710 | 0.227 | 0.908 | XP_001272890.1phospholipase, patatin family protein |
| EYR41_004100-T1 | -2.716 | -0.135 | 0.282 | ---NA--- |
| EYR41_008612-T1 | -2.729 | 0.767 | -1.863 | ---NA--- |
| EYR41_001983-T1 | -2.730 | -0.367 | -1.466 | XP_001265913.1calcium/calmodulin-dependent protein kinase, putative |
| EYR41_011160-T1 | -2.736 | 0.916 | -0.630 | ---NA--- |
| EYR41_011781-T1 | -2.741 | -0.137 | -0.633 | XP_002541811.1predicted protein |
| EYR41_011634-T1 | -2.742 | -0.310 | -1.995 | ---NA--- |
| EYR41_008620-T1 | -2.746 | -0.551 | -0.943 | XP_001259760.1amino acid transporter, putative |
| EYR41_001049-T2 | -2.746 | 0.346 | -0.878 | XP_001886922.1ectomycorrhiza-induced ankyrin-domain/NACHT-domain containing protein |
| EYR41_008422-T1 | -2.749 | 0.271 | -1.980 | ---NA--- |
| EYR41_002891-T1 | -2.761 | -0.945 | -1.311 | XP_001265436.1glycerol 3-phosphate dehydrogenase (GfdA), putative |
| EYR41_010910-T1 | -2.762 | -0.692 | -1.747 | ---NA--- |
| EYR41_011080-T1 | -2.778 | 0.872 | -1.842 | XP_001215689.1L-xylulose reductase |
| EYR41_008354-T1 | -2.787 | -0.403 | -1.716 | ---NA--- |
| EYR41_005961-T1 | -2.788 | -0.600 | -1.132 | XP_001260195.1siderochrome-iron transporter MirC |
| EYR41_006978-T1 | -2.788 | -0.117 | -1.580 | ---NA--- |
| EYR41_008613-T1 | -2.792 | 0.354 | -1.072 | XP_001264501.1MFS toxin efflux pump (AflT), putative |
| EYR41_004771-T1 | -2.806 | -0.188 | -1.712 | ---NA--- |
| EYR41_001687-T1 | -2.806 | -0.244 | -1.752 | XP_002582803.1predicted protein |
| EYR41_005753-T1 | -2.807 | -0.047 | -1.570 | WP_007914973.1mercuric reductase |
| EYR41_006007-T1 | -2.826 | 0.077 | -1.994 | XP_001275970.1epoxide hydrolase |
| EYR41_004073-T1 | -2.831 | -0.161 | -1.561 | XP_001271203.1Methionine synthase, vitamin-B12 independent, putative |
| EYR41_006788-T1 | -2.835 | -0.865 | -1.429 | EFL30295.1mannan polymerase complexes MNN9 subunit |
| EYR41_005773-T1 | -2.839 | -0.566 | -1.693 | XP_001269897.1sugar transporter |
| EYR41_008826-T1 | -2.843 | -0.678 | -1.211 | ---NA--- |
| EYR41_001037-T1 | -2.844 | 0.948 | -0.600 | ---NA--- |
| EYR41_011525-T1 | -2.853 | 0.105 | -2.399 | ---NA--- |
| EYR41_005305-T1 | -2.854 | -0.801 | -1.588 | XP_001887531.1tandem pore domain K+ channel |
| EYR41_008023-T1 | -2.863 | 0.575 | -3.590 | WP_053127134.1serine/threonine protein kinase |
| EYR41_009396-T2 | -2.866 | -0.284 | -0.622 | XP_010756477.1acyl-CoA thioesterase II |
| EYR41_003298-T1 | -2.868 | -0.848 | -0.221 | XP_001462456.1hypothetical protein |
| EYR41_005218-T1 | -2.868 | -0.902 | -1.474 | XP_001263147.1protein kinase domain-containing protein |
| EYR41_010639-T1 | -2.888 | -0.620 | -1.579 | XP_001261594.1NADH-dependent flavin oxidoreductase, putative |
| EYR41_003546-T1 | -2.907 | -0.546 | -1.775 | ---NA--- |
| EYR41_010675-T1 | -2.925 | 0.376 | -1.141 | AAP68824.1IFN-inducible and antiviral protein |
| EYR41_002272-T1 | -2.927 | 0.162 | -1.889 | WP_012509912.1YciI family protein |
| EYR41_005901-T1 | -2.929 | -0.720 | -0.018 | ---NA--- |
| EYR41_011151-T2 | -2.930 | -0.532 | 0.584 | XP_001213602.1predicted protein |
| EYR41_001457-T1 | -2.934 | -0.610 | -1.968 | XP_002541684.1hypothetical protein UREG_01200 |
| EYR41_004537-T1 | -2.936 | -0.460 | -1.470 | XP_001246772.1aldehyde dehydrogenase |
| EYR41_003491-T1 | -2.946 | -0.529 | -1.144 | XP_001266201.1HypA-like protein, putative |
| EYR41_003343-T1 | -2.947 | -0.834 | -1.424 | XP_002542512.1predicted protein |
| EYR41_006517-T1 | -2.950 | -0.259 | -1.709 | XP_001798116.1hypothetical protein SNOG_07789 |
| EYR41_001984-T1 | -2.950 | -0.364 | -1.803 | ---NA--- |
| EYR41_009923-T1 | -2.961 | -0.944 | -4.733 | ---NA--- |
| EYR41_007582-T1 | -2.963 | -0.448 | -1.950 | ---NA--- |
| EYR41_002763-T2 | -2.974 | -0.176 | -3.521 | ---NA--- |
| EYR41_006871-T1 | -2.982 | 0.212 | -1.139 | ---NA--- |
| EYR41_005130-T1 | -2.984 | -0.406 | -0.794 | CAG85665.1 DEHA2B16104p |
| EYR41_003527-T1 | -3.011 | -0.480 | -0.752 | ---NA--- |
| EYR41_011535-T1 | -3.013 | -0.450 | -1.232 | KTA98637.1 Endochitinase [ |
| EYR41_005951-T1 | -3.014 | 0.278 | -1.541 | ---NA--- |
| EYR41_008805-T1 | -3.030 | -0.063 | -1.138 | AAL56992.1integral membrane protein |
| EYR41_009722-T1 | -3.031 | -0.825 | -1.735 | XP_001272783.1peptidase (PNG1), putative |
| EYR41_000030-T1 | -3.039 | -0.807 | -1.896 | XP_001214180.1exoglucanase 1 precursor |
| EYR41_002490-T1 | -3.070 | -0.070 | -1.699 | ---NA--- |
| EYR41_009723-T1 | -3.085 | 0.737 | -1.608 | XP_001273155.1cupin domain protein |
| EYR41_005318-T1 | -3.107 | -0.593 | -1.716 | XP_001879843.1predicted protein |
| EYR41_003449-T1 | -3.116 | -0.392 | -1.724 | ---NA--- |
| EYR41_010621-T1 | -3.118 | -0.144 | -1.721 | ---NA--- |
| EYR41_002919-T1 | -3.121 | -0.664 | -1.674 | XP_001210784.1conserved hypothetical protein |
| EYR41_007025-T1 | -3.134 | -0.350 | -2.450 | XP_001876921.1predicted protein |
| EYR41_003462-T1 | -3.142 | -0.829 | -1.520 | XP_003713677.1PQ-loop repeat-containing protein 2 |
| EYR41_010319-T1 | -3.146 | -0.892 | -0.969 | XP_001266302.1endo-1,3(4)-beta-glucanase, putative |
| EYR41_007032-T1 | -3.153 | -0.028 | 0.400 | ---NA--- |
| EYR41_005224-T1 | -3.153 | -0.338 | -1.958 | ---NA--- |
| EYR41_004112-T1 | -3.157 | -0.218 | -1.971 | ---NA--- |
| EYR41_007531-T1 | -3.158 | -0.663 | -1.982 | XP_001880864.1peroxysomal citrate synthase |
| EYR41_000192-T1 | -3.159 | 0.191 | -0.580 | ---NA--- |
| EYR41_010402-T1 | -3.167 | -0.092 | -1.726 | ---NA--- |
| EYR41_002208-T1 | -3.169 | -0.112 | -2.641 | WP_009173569.1glutathione S-transferase family protein |
| EYR41_000524-T1 | -3.173 | 0.003 | -2.014 | XP_001261374.1alcohol dehydrogenase, zinc-containing |
| EYR41_009667-T1 | -3.190 | -0.020 | -1.518 | ---NA--- |
| EYR41_003592-T1 | -3.196 | -0.605 | -1.697 | ---NA--- |
| EYR41_007532-T1 | -3.201 | -0.567 | -1.355 | XP_001263689.1enoyl-CoA hydratase/isomerase family protein |
| EYR41_001116-T1 | -3.210 | -0.586 | -1.184 | ---NA--- |
| EYR41_006692-T1 | -3.214 | -0.178 | -1.160 | NP_595268.1histone promoter control protein Hip4 |
| EYR41_008701-T1 | -3.215 | 0.485 | -0.611 | WP_012709348.1DUF3445 domain-containing protein |
| EYR41_009798-T1 | -3.221 | 0.396 | -1.910 | XP_001258294.1conserved hypothetical protein |
| EYR41_004764-T3 | -3.229 | 0.995 | -0.929 | ---NA--- |
| EYR41_008839-T4 | -3.237 | 0.767 | 1.627 | ---NA--- |
| EYR41_011434-T2 | -3.247 | -0.897 | -0.701 | XP_002790019.1mitochondrial DNA replication protein YHM2 |
| EYR41_010558-T1 | -3.262 | -0.553 | 0.461 | ---NA--- |
| EYR41_003535-T1 | -3.264 | -0.519 | -1.098 | XP_001270259.1MFS transporter, putative |
| EYR41_011540-T2 | -3.279 | 0.589 | -0.640 | XP_001271770.1dienelactone hydrolase family protein |
| EYR41_003391-T1 | -3.284 | -0.566 | -1.295 | AAS66028.1hexose transporter |
| EYR41_010691-T1 | -3.313 | 0.599 | -0.176 | WP_012008807.1peptidase S8 |
| EYR41_010121-T1 | -3.315 | -0.323 | -1.864 | XP_001216909.1predicted protein |
| EYR41_008112-T1 | -3.319 | -0.283 | -1.414 | ---NA--- |
| EYR41_006852-T1 | -3.331 | 0.494 | -0.481 | ---NA--- |
| EYR41_010304-T1 | -3.344 | -0.410 | -2.546 | XP_001799354.1hypothetical protein SNOG_09051 |
| EYR41_004449-T1 | -3.352 | -0.802 | -1.974 | EHA50938.1 candidapepsin-3 |
| EYR41_005326-T1 | -3.360 | -0.095 | -2.241 | XP_001217597.1predicted protein |
| EYR41_006332-T1 | -3.362 | 0.303 | -1.149 | XP_001246041.1hypothetical protein CIMG_05482 |
| EYR41_004719-T1 | -3.368 | 0.226 | -2.413 | XP_001273849.1short chain dehydrogenase/reductase family oxidoreductase, putative |
| EYR41_000443-T1 | -3.371 | 0.206 | -3.320 | XP_001240809.1developmental regulator flbA |
| EYR41_002577-T1 | -3.393 | 0.155 | -1.939 | ---NA--- |
| EYR41_009121-T1 | -3.399 | -0.314 | -1.917 | XP_001267413.1MFS transporter, putative |
| EYR41_011672-T1 | -3.409 | -0.869 | -1.833 | XP_002542465.1predicted protein |
| EYR41_010599-T1 | -3.443 | -0.212 | -2.276 | XP_001268993.13-ketoacyl-CoA ketothiolase (Kat1), putative |
| EYR41_001985-T1 | -3.452 | -0.946 | -1.936 | ---NA--- |
| EYR41_002474-T1 | -3.463 | -0.571 | -1.689 | XP_001264534.1mitochondrial hypoxia responsive domain protein |
| EYR41_003020-T1 | -3.463 | -0.908 | -1.902 | Q9UW81.1 RecName: Full=Opsin-1; AltName: Full=NR |
| EYR41_006748-T1 | -3.483 | -0.537 | -2.080 | ---NA--- |
| EYR41_001211-T1 | -3.499 | -0.785 | -1.757 | XP_001888857.1predicted protein |
| EYR41_008901-T1 | -3.530 | -0.709 | -1.752 | XP_003710928.1alcohol dehydrogenase 1 |
| EYR41_003181-T1 | -3.542 | 0.045 | -1.997 | XP_001244234.1LipA and NB-ARC domain-containing protein |
| EYR41_002256-T1 | -3.586 | -0.286 | -1.547 | ---NA--- |
| EYR41_001921-T1 | -3.587 | -0.479 | -1.574 | ---NA--- |
| EYR41_000959-T1 | -3.611 | -0.308 | -2.335 | WP_012388201.1ankyrin repeat domain-containing protein |
| EYR41_011837-T1 | -3.651 | -0.262 | -2.130 | ---NA--- |
| EYR41_005806-T1 | -3.652 | 0.414 | -1.737 | XP_002911037.1D-lactaldehyde dehydrogenase |
| EYR41_004356-T1 | -3.685 | 0.623 | -1.828 | ABM14812.1 glycosyltransferase, MGT family |
| EYR41_007402-T1 | -3.687 | -0.097 | -1.321 | ---NA--- |
| EYR41_005445-T1 | -3.696 | -0.351 | -1.944 | XP_001265391.1aspartyl-tRNA synthetase, cytoplasmic |
| EYR41_011695-T1 | -3.705 | 0.662 | -2.234 | XP_001263231.1RNA exonuclease Rex3, putative |
| EYR41_009487-T1 | -3.727 | 0.281 | -1.875 | ---NA--- |
| EYR41_008984-T1 | -3.750 | 0.167 | -1.632 | ---NA--- |
| EYR41_010840-T1 | -3.769 | -0.176 | -1.517 | ---NA--- |
| EYR41_006478-T1 | -3.772 | -0.070 | -1.586 | ---NA--- |
| EYR41_006921-T1 | -3.789 | -0.780 | -1.871 | XP_001243645.1STE/STE7 protein kinase |
| EYR41_000726-T1 | -3.793 | -0.542 | -1.520 | XP_001270694.1fungal specific transcription factor domain protein |
| EYR41_004885-T1 | -3.802 | 0.182 | -2.541 | XP_001272579.1FK506 suppressor Sfk1, putative |
| EYR41_009483-T1 | -3.804 | 0.333 | -0.894 | ---NA--- |
| EYR41_005152-T1 | -3.817 | -0.720 | -0.716 | ---NA--- |
| EYR41_008438-T2 | -3.848 | 0.714 | -0.496 | ---NA--- |
| EYR41_002576-T1 | -3.879 | -0.695 | -1.508 | ---NA--- |
| EYR41_010595-T2 | -3.915 | -0.875 | -2.499 | XP_001275599.1transcriptional regulator Medusa |
| EYR41_011207-T1 | -3.921 | -0.479 | -2.585 | ---NA--- |
| EYR41_006981-T1 | -3.951 | -0.477 | -2.790 | ---NA--- |
| EYR41_005913-T1 | -3.985 | -0.439 | -0.144 | XP_001797967.1hypothetical protein SNOG_07633 |
| EYR41_011173-T1 | -4.038 | -0.545 | -0.898 | ---NA--- |
| EYR41_010874-T2 | -4.047 | -0.248 | -1.523 | ---NA--- |
| EYR41_011877-T1 | -4.106 | 0.044 | -2.775 | ---NA--- |
| EYR41_003613-T3 | -4.119 | -0.663 | -0.960 | XP_001218114.1predicted protein |
| EYR41_009023-T1 | -4.126 | -0.680 | -1.798 | ---NA--- |
| EYR41_007394-T1 | -4.227 | -0.113 | -3.131 | XP_002793779.1initiation-specific alpha-1,6-mannosyltransferase |
| EYR41_009346-T1 | -4.289 | 0.123 | -1.851 | ---NA--- |
| EYR41_001676-T1 | -4.397 | -0.649 | -2.558 | XP_003719754.1platelet-activating factor acetylhydrolase |
| EYR41_007026-T1 | -4.453 | -0.102 | -3.536 | XP_001274981.1GNAT family acetyltransferase, putative |
| EYR41_003381-T1 | -4.522 | -0.494 | -0.302 | XP_001258299.1RTA1 like protein |
| EYR41_009799-T2 | -4.530 | 0.844 | -1.588 | ---NA--- |
| EYR41_006085-T1 | -4.604 | -0.157 | -2.555 | ---NA--- |
| EYR41_011405-T4 | -4.649 | -0.445 | 1.188 | XP_001217909.1predicted protein |
| EYR41_001541-T3 | -4.867 | -0.644 | -1.382 | CAG97958.1 KLLA0F03751p |
| EYR41_008974-T1 | -4.896 | 0.268 | -1.683 | ---NA--- |
| EYR41_005972-T1 | -4.919 | 0.624 | -0.169 | ---NA--- |
| EYR41_003318-T2 | -5.014 | -0.813 | -2.844 | XP_001269557.1sterol o-acyltransferase (APE2), putaitve |
| EYR41_005696-T2 | -5.189 | -0.781 | -0.966 | XP_001273525.1lipase/serine esterase, putative |
| EYR41_002473-T1 | -5.245 | -0.919 | -1.260 | ---NA--- |
| EYR41_005978-T2 | -5.278 | -0.578 | -3.475 | WP_013323641.1response regulator |
| EYR41_001223-T1 | -5.356 | -0.475 | -0.979 | XP_001883560.1predicted protein |
| EYR41_005783-T2 | -5.518 | -0.001 | -4.528 | XP_001271974.1C2 domain protein |
| EYR41_004853-T2 | -5.543 | -0.333 | -2.063 | XP_001265054.1L-serine dehydratase, putative |
| EYR41_007662-T2 | -5.544 | -0.769 | -1.953 | XP_001266048.1acyltransferase, putative |
| EYR41_007438-T1 | -5.577 | -0.511 | -0.922 | XP_001266016.1sucrose transporter, putative |
| EYR41_010420-T2 | -5.723 | -0.600 | -1.473 | XP_001268977.1gamma-tubulin complex component GCP6, putative |
| EYR41_005314-T1 | -6.143 | -0.633 | -2.959 | XP_001260822.1phospholipase D Active site motif protein |
| EYR41_003036-T2 | -6.179 | -0.428 | -3.877 | XP_001248123.1DNA polymerase epsilon catalytic subunit A |
| EYR41_006471-T2 | -6.617 | -0.122 | -2.819 | ---NA--- |
| EYR41_007531-T2 | -6.678 | -0.539 | -3.475 | XP_001880864.1peroxysomal citrate synthase |
| EYR41_002891-T2 | -7.066 | -0.087 | -7.159 | XP_001265436.1glycerol 3-phosphate dehydrogenase (GfdA), putative |
